# Supplementary material
Source: PubMed Central journal article supplement (PMC4946943)
Supplement: supp_M115.708065_Supplemental_data.pdf [file supp_M115.708065_Supplemental_data.pdf]

## Supplementary Information

Energetic Mechanism of Cytochrome *c*-Cytochrome *c* Oxidase Electron Transfer Complex Formation under Turnover Condition Revealed by Mutational Effects and Docking Simulation

Wataru Sato<sup>1,†</sup>, Seiji Hitaoka<sup>2,†</sup>, Kaoru Inoue<sup>3</sup>, Mizue Imai<sup>1</sup>, Tomohide Saio<sup>1,4</sup>, Takeshi Uchida<sup>1,4</sup>,  
Kyoko Shinzawa-Itoh<sup>5</sup>, Shinya Yoshikawa<sup>5</sup>, Kazunari Yoshizawa<sup>2,‡</sup>, and Koichiro Ishimori<sup>1,4,‡</sup>

<sup>1</sup>From the Graduate School of Chemical Sciences and Engineering, Hokkaido University, Sapporo 060-8628, Japan,

<sup>2</sup>The Institute for Materials Chemistry and Engineering, Kyushu University, Fukuoka 819-0315, Japan,

<sup>3</sup>The Division of Chemistry, Graduate School of Science, Hokkaido University, Sapporo 060-0810, Japan,

<sup>4</sup>The Department of Chemistry, Faculty of Science, Hokkaido University, Sapporo 060-0810, Japan,

<sup>5</sup>The Department of Life Science, Graduate School of Life Science, University of Hyogo, Hyogo 678-1297, Japan

\*Running title: *Energetic Analysis of Interactions between Cyt c and CcO*

<sup>†</sup>Both authors contributed equally to this work.

<sup>‡</sup>To whom correspondence should be addressed:

Koichiro Ishimori, The Department of Chemistry, Faculty of Science, Hokkaido University, Kita 10, Nishi 8, Kita-ku, Sapporo 060-0810, Japan, Tel:81(11)706-2707; Fax: 81(11)706-3501; E-mail: koichiro@sci.hokudai.ac.jp

### Table of Contents:

|                                                                                                                                                    | Page    |
|----------------------------------------------------------------------------------------------------------------------------------------------------|---------|
| <b>Table S1</b> Interatomic distances (Å) between heme groups and its ligated amino acid residues                                                  | S-2     |
| <b>Table S2</b> Energetic contributions of Cyt <i>c</i> and each subunit of CcO                                                                    | S-3     |
| <b>Figure S1</b> Predicted binding interfaces of the Cyt <i>c</i> -CcO complexes of poses (a) 1, (b) 6, (c) 10, (d) 11, (e) 13, (f) 24, and (g) 25 | S-4-S-5 |
| <b>Figure S2</b> CcO interaction site on wild type and Lys-13 → Leu mutant Cyt <i>c</i> .                                                          | S-6     |

**Table S1** Interatomic distances (Å) between heme groups and its ligated amino acid residues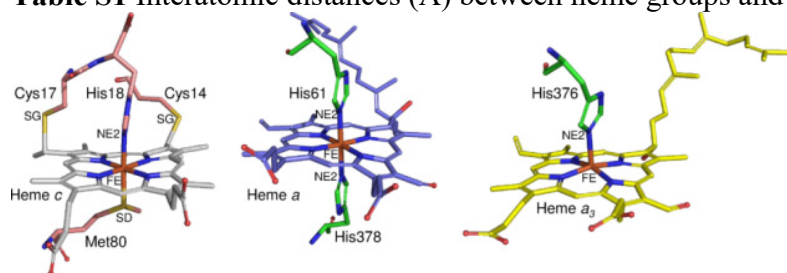

| distance <sup>a</sup>                       | protein (subunit) | observed <sup>b</sup> |
|---------------------------------------------|-------------------|-----------------------|
| Heme <i>c</i> @FE...His18@NE2               | Cyt <i>c</i>      | 2.02 (0.06)           |
| Heme <i>c</i> @FE...Met80@SD                | Cyt <i>c</i>      | 2.30 (0.04)           |
| Heme <i>c</i> @CAB...Cys14@SG               | Cyt <i>c</i>      | 1.89 (0.09)           |
| Heme <i>c</i> @CAC...Cys17@SG               | Cyt <i>c</i>      | 2.13 (0.14)           |
| Heme <i>a</i> @FE...His61@NE2               | CcO (I)           | 1.95 (0.08)           |
| Heme <i>a</i> @FE...His378@NE2              | CcO (I)           | 1.95 (0.06)           |
| Heme <i>a</i> <sub>3</sub> @FE...His376@NE2 | CcO (I)           | 2.10 (0.11)           |

<sup>a</sup> See the insert figure.

<sup>b</sup> Average value and standard deviation (in parentheses). These values were obtained from the crystallographic structures of Cyt *c* and CcO (PDB codes: 1J3S, 3NWV, 3ZCF, and 3ZOO (Cyt *c*); 1OCR, 1OCZ, 1V54, 1V55, 1OCC, 1OCO, 2Y69, 2ZXW, 2DYR, 2DYS, 2EIJ, 2EIK, 2EIL, 2EIM, 2EIN, 2OCC, 3ABM, 3AG1, 3AG2, 3AG3, 3AG4, 3ASN, 3ASO, 3ABK, and 3ABL (CcO)).

**Table S2** Energetic contributions of Cyt *c* and each subunit of CcO

| protein (subunit)      | $\Delta E_{\text{vdW}}^a$ | $\Delta G_{\text{electro}}^{a,b}$ | $\Delta G_{\text{nonpolar}}^a$ | $\Delta G_{\text{tot}}^{a,c}$ |
|------------------------|---------------------------|-----------------------------------|--------------------------------|-------------------------------|
| wild-type Cyt <i>c</i> | -69.7                     | 19.5                              | -12.5                          | -62.7                         |
| CcO (I)                | -12.6                     | -5.6                              | -1.7                           | -20.0                         |
| CcO (II)               | -9.7                      | -5.1                              | -1.7                           | -16.5                         |
| CcO (III)              | -3.8                      | -1.2                              | -0.6                           | -5.6                          |
| CcO (IV–XIII)          | -43.6                     | 17.9                              | -6.7                           | -32.4                         |

<sup>a</sup> In kcal/mol.

<sup>b</sup>  $\Delta E_{\text{coul}} + \Delta G_{\text{polar}}$ .

<sup>c</sup>  $\Delta E_{\text{vdW}} + \Delta E_{\text{coul}} + \Delta G_{\text{polar}} + \Delta G_{\text{nonpolar}}$ .

(a) Pose 1

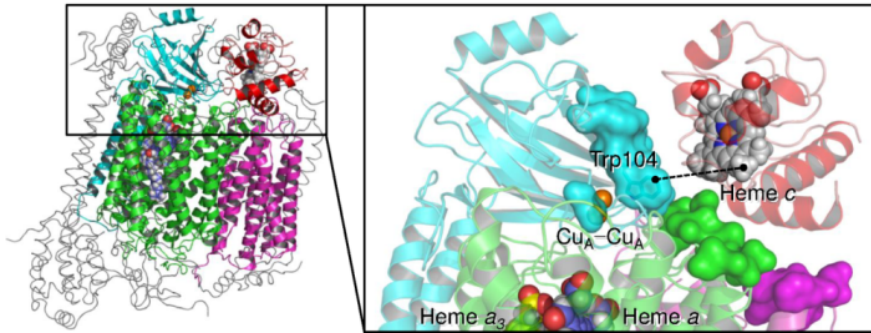

(b) Pose 6

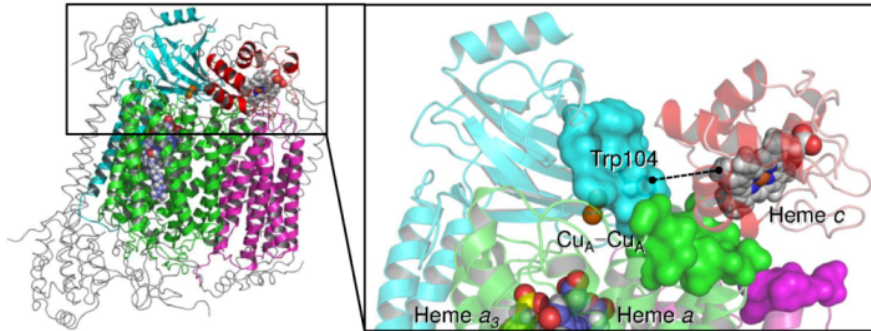

(c) Pose 10

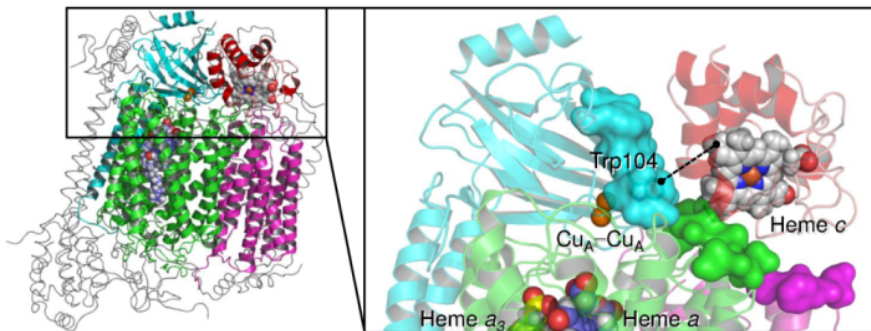

(d) Pose 11

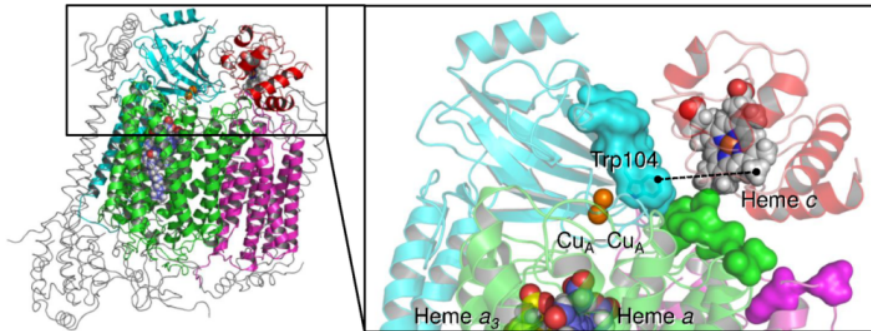

(e) Pose 13

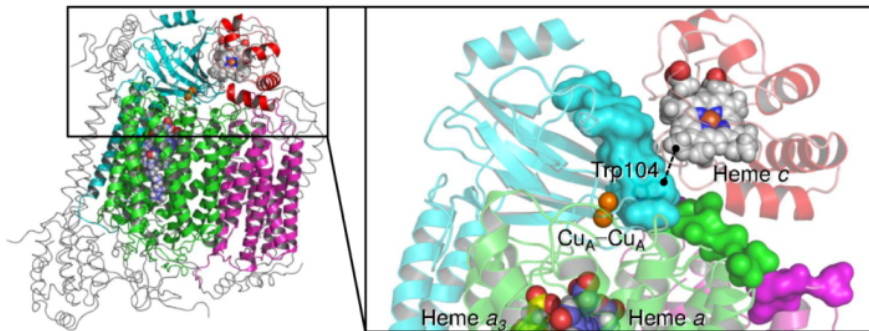

(f) Pose 24

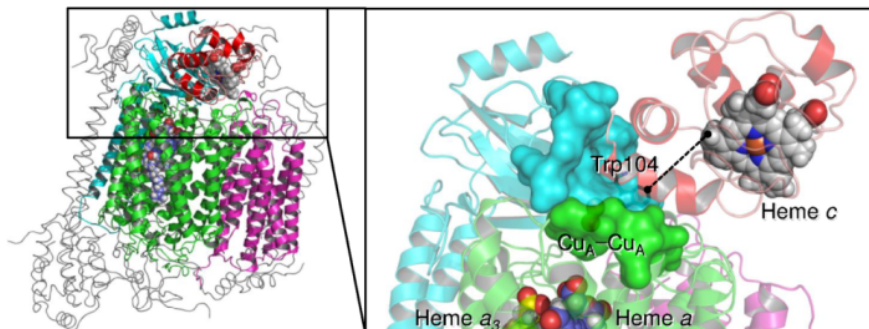

(g) Pose 25

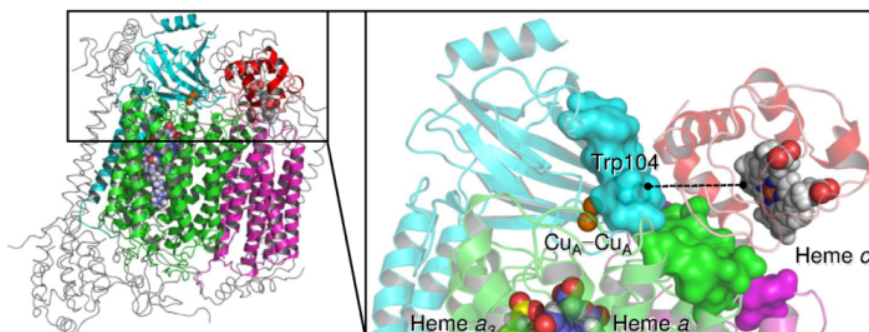

**Figure S1** Predicted binding interfaces of the Cyt *c*-CcO complexes of poses (a) 1, (b) 6, (c) 10, (d) 11, (e) 13, (f) 24, and (g) 25. The contact residues in subunits I, II, and III of CcO are represented in green, cyan, and magenta surfaces, respectively. Dashed lines indicate the heme *c*-Trp104 distances.

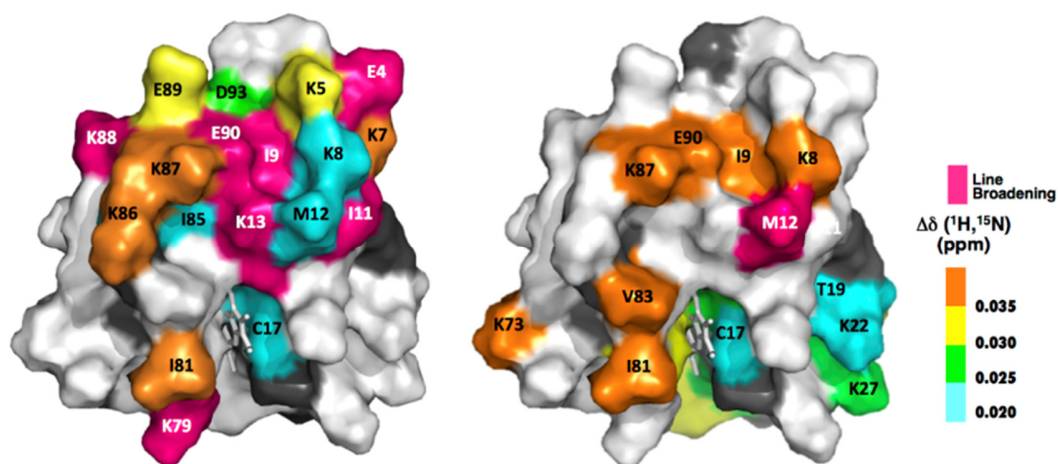

**Figure S2. CcO interaction site on wild type and Lys-13 → Leu mutant Cyt *c*.** Wild type (left) and Lys13 → Leu mutant Cyt *c* (right). The amino acid residues showing significant chemical shift perturbations associated with the binding CcO ( $\Delta\delta > 0.020$  or line broadening) are highlighted.
