# Supplementary material
Source: PubMed Central journal article supplement (PMC4946943)

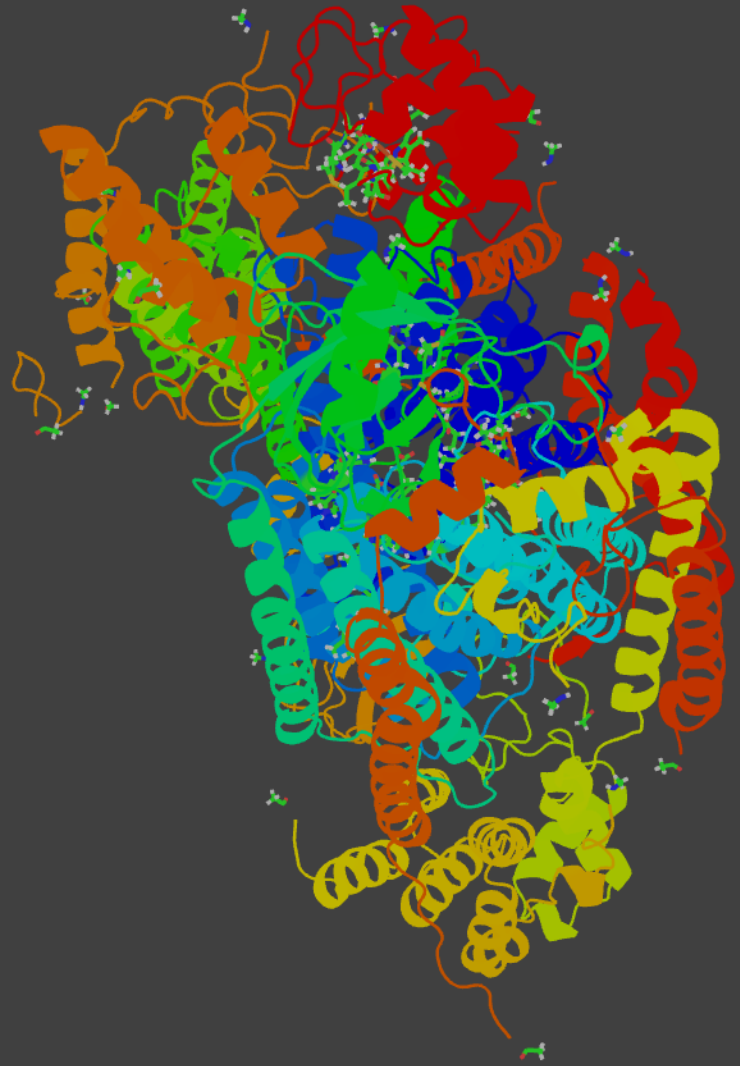

Supplement: supp_M115.708065_Wild-type.pdf [file supp_M115.708065_Wild-type.pdf]
